# Supplementary material
Source: PubMed Central journal article supplement (PMC5572896)
Supplement: NIHMS880297-supplement-1.pdf [file NIHMS880297-supplement-1.pdf]

## Supplemental Figure Legends

### Figure S1, related to Figure 1. *Gcgr*<sup>-/-</sup> mice have severe $\alpha$ -cell hyperplasia. (A-B)

Representative images of pancreatic  $\alpha$ -cell staining in *Gcgr*<sup>+/+</sup> (left) and *Gcgr*<sup>-/-</sup> (right) 5 month old mice. Glucagon staining (green), amylase staining (red), and DAPI staining (blue); White boxes indicate regions for insets. White scale bars indicate 1mm. Islets from *Gcgr*<sup>-/-</sup> mice are often associated with ductal structures and even envelop ductal structures (nesidioblastosis- see white asterisks). (C) Schematic for *in vitro*  $\alpha$ -cell proliferation assay with algorithm building to measure proliferation rates. (D) Dose responsiveness of  $\alpha$ -cell proliferation in mouse to *Gcgr*<sup>-/-</sup> mouse serum-supplemented media. Control media with no mouse serum added (grey, n=3) and increasing doses of *Gcgr*<sup>-/-</sup> whole mouse serum-supplemented media (red, n=2-8) are shown. \*\*p<0.01 vs control media, ##p<0.01 vs. 0.1% *Gcgr*<sup>-/-</sup> mouse serum-supplemented media, and \$p<0.05 vs. 1% *Gcgr*<sup>-/-</sup> mouse serum-supplemented media. (E-F) Representative images of (E) somatostatin and (F) insulin staining (green) in dispersed cytopsin islets. Ki67 and DAPI staining are shown in red and blue, respectively. Data are mean  $\pm$  SEM.

### Figure S2, related to Figure 2. Acute and chronic models of interrupted glucagon receptor signaling have common alterations in liver gene. (A-B)

Representative images of pancreatic islet  $\alpha$ -cell proliferation in mice treated with PBS or GCGR mAb for 10 days. Glucagon staining (green), Ki67 staining (red), and DAPI staining (blue) are shown. White arrows indicate proliferating  $\alpha$ -cells. (C)  $\alpha$ -cell proliferation in mice treated with PBS or GCGR mAb for 10 days. (D) Principle component analysis of liver RNA-Seq from mice with interrupted glucagon signaling. (E) Spearman correlation of each treatment group from RNA-Seq analyses. (F) Venn diagram of hepatic gene changes in mice. Volcano plots of genes altered in RNA-Seq analyses of livers from (G) "acute" GCGR mAb treatment and (H) "chronic" *Gcgr*<sup>-/-</sup> mice versus *Gcgr*<sup>+/+</sup> mice. Red dots are genes that are significantly downregulated in either GCGR mAb or *Gcgr*<sup>-/-</sup> mice (p<0.05). Green dots are genes that are significantly upregulated in either GCGR

mAb or *Gcgr*<sup>-/-</sup> mice ( $p < 0.05$ ). (I) Plot of top gene changes in each model. Log<sub>2</sub> fold gene changes observed in both *Gcgr*<sup>+/+</sup> vs. *Gcgr*<sup>-/-</sup> and *Gcgr*<sup>+/+</sup> vs. GCGR mAb-treated mice are shown with green circles. Log<sub>2</sub> fold gene changes observed in both *Gcgr*<sup>+/+</sup> vs. *Gcgr*<sup>-/-</sup> and WT vs. *Gcgr*<sup>+</sup> mice (see Song et al., 2014 for details on WT vs. *Gcgr*<sup>+</sup> mice) are shown with blue triangles. Black arrows indicate gene expression changes in three secreted factors. (J) Log<sub>2</sub> fold changes in liver gene expression of predicted secreted proteins. (K) Log<sub>2</sub> fold changes in liver gene expression related to lipid and bile metabolism. GCGR mAb-treated *Gcgr*<sup>+/+</sup> versus PBS-treated *Gcgr*<sup>+/+</sup> mice (blue bars,  $n=3$ ) and PBS-treated *Gcgr*<sup>-/-</sup> versus PBS-treated *Gcgr*<sup>+/+</sup> mice (red bars,  $n=3$ ) are shown. (L) Mouse serum bile acid levels in PBS-treated *Gcgr*<sup>+/+</sup> (white bars), GCGR mAb-treated *Gcgr*<sup>+/+</sup> (blue bars), and PBS-treated *Gcgr*<sup>-/-</sup> (red bars) mice. One-way ANOVA with Tukey posthoc analyses; \* $p < 0.05$ , \*\*\* $p < 0.001$  vs *Gcgr*<sup>-/-</sup> mouse serum. (M)  $\alpha$ -cell proliferation in response to delipidated *Gcgr*<sup>-/-</sup> mouse serum. Control media with no mouse serum added (grey bars,  $n=2$ ), 10% *Gcgr*<sup>-/-</sup> whole mouse serum -supplemented media (red bar,  $n=2$ ), 10% *Gcgr*<sup>-/-</sup> delipidated mouse serum -supplemented media (red left hashed bar,  $n=2$ ) islet cultures are shown. One-way ANOVA with Tukey posthoc analyses; \* $p < 0.05$  vs control media. (N)  $\alpha$ -cell proliferation in response to human low density lipoprotein (hLDL), Angptl-4 and palmitate. One-way ANOVA with Tukey posthoc analyses; \*\*\* $p < 0.001$  vs all other conditions accepted Low AA versus High AA Low Q comparisons (not significant). Fatty acid-free bovine serum albumin (BSA-EtOH) was used as control for palmitate complexed with fatty acid-free BSA. Angptl-4 was complexed with hLDL. This experiment was performed as close as possible to the experiment described in Ben-Zvi et al., 2015 with the exception that here islets were cultured for 72 hours in the respective media. Data are mean  $\pm$  SEM.

**Figure S3, related to Figure 2. High levels of serum L-glutamine and other amino acids in mice with interrupted glucagon signaling stimulate selective  $\alpha$ -cell proliferation.** (A) Mouse serum AA levels measured by MS in *Gcgr*<sup>-/-</sup> (red), GCGR mAb-treated for 10 days (blue), and PBS-treated (white) \* $p < 0.05$ , \*\* $p < 0.01$ , \*\*\* $p < 0.001$  vs PBS-treated *Gcgr*<sup>+/+</sup> mice.

#p<0.05, ##p<0.01 vs. GCGR mAb-treated 10 day mice; n=3-8. (B) Quantification of L-alanine, L-citrulline, and L-ornithine dose response effects alone or in combination on  $\alpha$ -cell proliferation in cultured mouse islets treated for 3 days. One-way ANOVA with Tukey posthoc analyses; ###p<0.001 vs *Gcgr*<sup>-/-</sup> mouse serum-treated islets (red), \*\*\*p<0.001 vs control media-treated islets (first gray bar on left). (B) Quantification of total islet cell proliferation, (C) percentage of non  $\alpha$ -cells proliferation and (D) percentage of cells proliferating under each AA condition that are  $\alpha$ -cells in response to media with increasing AA concentration media. This is the total number of glucagon<sup>+</sup> Ki67<sup>+</sup> double positive cells per the total number of glucagon<sup>+</sup> cells. White (low) to gray (intermediate) to black (high) color indicates combined concentration of all AA in each media condition (see Table S4 for combined and individual AA media concentrations); n=3-8. The red bar indicates 10% *Gcgr*<sup>-/-</sup> mouse serum -supplemented media similar to Figure 1E. One-way ANOVA with Tukey posthoc analyses; \*\*\*p<0.001 vs *Gcgr*<sup>-/-</sup> mouse serum -supplemented media (red), ###p<0.01 vs. highest AA media-treated islets (black), and \$p<0.05 vs. highest AA media-treated islets (dark gray). in response to media with increasing amino acid concentration containing media for 3 days. (F) Quantification of islet cell proliferation and (G) non- $\alpha$ -cell proliferation in response to altering individual amino acid levels in cultured mouse islets. One-way ANOVA with Tukey posthoc analyses; n=3, There were no statistical differences observed between high L-glutamate, L-leucine, and L-glutamine media (High ELQ)-treated islets, low L-glutamate, L-leucine, and L-glutamine media (Low ELQ)-treated islets, low L-glutamine (Low Q)- treated islets, low L-glutamate (Low E)- treated islets, or low L-leucine (Low L)-treated islets. (H) Quantification of L-glutamine dose response stimulated islet cell proliferation and (I) non- $\alpha$ -cell proliferation in cultured mouse islets. One-way ANOVA with Tukey posthoc analyses; n=3, \*\*\*p<0.001 vs 3250  $\mu$ M L-glutamine media-treated islets, #p<0.05, ##p<0.01 vs 2055  $\mu$ M L-glutamine media-treated islets. Data are mean  $\pm$  SEM.

**Figure S4, related to Figure 3. mTOR signaling and FoxP transcription factor are essential for  $\alpha$ -cell proliferation in response to interrupted glucagon signaling. (A)**

Random blood glucose (mg/dl), (B) glucose/arginine-stimulated blood glucose (mg/dl), and (C) glucose/arginine-stimulated serum glucagon (pg/ml) in mice after cotreatment with GCGR mAb and rapamycin. Saline/PBS treated (white), Saline/GCGR mAb treated (blue), Rapamycin/PBS-treated (white left hashed) and rapamycin/GCGR mAb treated (blue left hashed) are shown. Two-way ANOVA with Bonferroni posthoc analyses; \* $p < 0.05$ , \*\* $p < 0.01$ , and \*\*\* $p < 0.001$  vs PBS treated and # $p < 0.05$  and ### $p < 0.001$  vs. Saline treated. (D-E) Representative images of pancreatic islet  $\alpha$ -cell proliferation in Saline/PBS- and Rapamycin/PBS- treated mice. Glucagon staining (green), Ki67 staining (red), and DAPI staining (blue) are shown. White scale bars indicate 100 $\mu$ m. White dashed boxes indicate region selected for insets (D'-E'). (F-G) Representative images of pancreatic islet  $\alpha$ -cell expression of pS6 protein in Saline/PBS- and Rapamycin/PBS-treated mice. Glucagon staining (green), pS6(pS235/S236) staining (red), and DAPI staining (blue) are shown. White scale bars indicate 100 $\mu$ m. White dashed boxes indicate region selected for insets (F'-G'). (H) Body mass, (I) random blood glucose (mg/dl), and (J) pancreatic mass in Gcgr mAb-treated *FoxP1/2/4*<sup>-/-</sup> mice. Wildtype/PBS-treated (white), Wildtype/GCGR mAb-treated (blue), *FoxP1/2/4*<sup>-/-</sup>/PBS-treated (white left hashed) and *FoxP1/2/4*<sup>-/-</sup>/GCGR mAb-treated (blue left hashed) are shown. Two-way ANOVA with Bonferroni posthoc analyses; \* $p < 0.05$  and \*\*\* $p < 0.001$  vs PBS-treated and ## $p < 0.01$  vs. Saline-treated. Representative images of pancreatic islet (K)  $\alpha$ - and (L)  $\beta$ -cell expression of Cre Recombinase protein in *FoxP1/2/4*<sup>-/-</sup> mice. Glucagon and insulin staining (green) respectively, Cre staining (red), and DAPI staining (blue) are shown (n=3). (M-P) Representative images of pancreatic islet  $\alpha$ -cell expression of pS6 protein in (K) Wildtype/PBS-, (L) *FoxP1/2/4*<sup>-/-</sup>/PBS-, (M) Wildtype/GCGR mAb-, and (N) *FoxP1/2/4*<sup>-/-</sup>/GCGR mAb-treated mice. Glucagon staining (green), pS6(pS235/S236) staining (red), and DAPI staining (blue) are shown (n=3). White scale bars indicate 50 $\mu$ m. White dashed boxes indicate region selected for insets. (O) Quantification of rapamycin effects on amino acid-stimulated islet cell and (P) non- $\alpha$ -cell proliferation in cultured mouse islets treated for 3 days. Highest amino acid media with DMSO added (black,

n=3), highest amino acid media with 30nM rapamycin added for the last 24 hours of culture (black left hashed, n=2), highest amino acid media with 30nM rapamycin added for the full 72 hours of culture (black right hashed, n=3); one-way ANOVA with Tukey posthoc analyses; \*p<0.05 and \*\*p<0.01 vs DMSO-treated. Data are mean ± SEM.

**Figure S5, related to Figure 4. *Slc38a5* expression is upregulated in α-cells and required for expansion of α-cells in response to interrupted glucagon signaling. (A-D)**

Representative images of pancreatic islet α-cell SLC38A5 expression in (A) Saline/PBS, (B) Rapamycin/PBS-, (C) Saline/GCGR mAb-, and (D) Rapamycin/GCGR mAb-treated NSG<sup>TM</sup> mice (n=3). Glucagon staining (green), SLC38A5 staining (red), and insulin staining (blue) are shown. White scale bars indicate 50 μm. White dashed boxes indicate region selected for insets. (E-H) Representative images of pancreatic islet α-cell expression of SLC38A5 protein in (E) Wildtype/PBS-, (F) *FoxP1/2/4<sup>-/-</sup>*/PBS-, (G) Wildtype/GCGR mAb-, and (H) *FoxP1/2/4<sup>-/-</sup>*/GCGR mAb-treated mice (n=3). Glucagon staining (green), SLC38A5 staining (red), and insulin staining (blue) are shown. White scale bars indicate 50μm. White dashed boxes indicate region selected for insets. (I) Quantification of SLC38A5+ β-cells in *Gcgr<sup>Hep+/+</sup>* (white) and *Gcgr<sup>Hep-/-</sup>* (red) mouse pancreas. Students t-test - not significant. Quantification of (J) total SLC38A5+ islet-cell proliferation and (K) SLC38A5+ non-α-cells in isolated islets cultured in Low AA, High AA Low Q, or High AA media for four days. \*p<0.05 and \*\*p<0.01 vs High-AA treated; n=3. Data are mean ± SEM.

**Figure S6, related to Figure 5. Human pancreatic islet α-cells proliferate when glucagon signaling is interrupted. (A) Perfusion of donor human islets used in these experiments.**

Insulin secretion in response to 5.6mM to 16.7mM glucose and 100μM IBMX is shown in blue. (B) Body mass over treatment (n=9-46), (C) random blood glucose over treatment (n=9-39), (D) glucose/arginine stimulated blood glucose (n=49-50), (E) glucose/arginine stimulated serum glucagon (n=49-50), and (F) glucose/arginine stimulated serum GLP-1 levels (n=10) in NSG mice treated with PBS (grey circles) or GCGR mAb (grey triangles) for 14 days. (Student's t-

test, \*\*\*  $p < 0.0001$ ; N.D. not detected). Note: Serum GLP-1 levels of all PBS-treated mice ( $n=10$ ) were below the detection limit of the GLP-1 assay (41 pg/ml). The GLP-1 level for all glucose/arginine-stimulated *Gcgr* mAb mouse sample ( $n=10$ ) were within the assay's detection limit. Therefore, no statistical analyses were performed. (G) Mouse pancreas mass ( $n=43-45$ ) after 2 weeks of treatment with GCGR mAb; Student's t-test, \*\*\*  $p < 0.0001$ . Representative images of  $\alpha$ -cell proliferation in PBS and GCGR mAb-treated (H-I) mouse pancreas and (J-K) human islet donor grafts at 2 weeks treatment. Glucagon staining (green), Ki67 staining (red), and DAPI staining (blue) are shown. Proliferating  $\alpha$ -cells (Ki67<sup>+</sup> glucagon<sup>+</sup>) are indicated by white arrows. (L) Quantification of mouse  $\alpha$ -cell proliferation ( $n=3$ ) from non-responder human islet donors after 2 weeks of treatment with GCGR mAb. Student's T-test analyses; \* $p < 0.05$  vs PBS-treated. (M) Human  $\alpha$ -cell proliferation in donor islets pooled from 7 different experiments of NSG mice treated with PBS or GCGR mAb and separated by responders ( $n=23$ ) or non-responders ( $n=11$ ). Student's T-test analyses; \*\*\* $p < 0.001$  vs PBS-treated. Representative images of  $\alpha$ -cell proliferation in PBS and GCGR mAb-treated (N-O) human islet donor grafts at 2 weeks treatment. Glucagon staining (green), SLC38A5 staining (red), and Insulin staining (blue) are shown. White asterisk indicates mouse kidney tissue. Data are mean  $\pm$  SEM.

**Table S1, related to Figure 2. Fold Change  $\geq 1.5X$  in hepatic gene expression in PBS-treated *Gcgr*<sup>-/-</sup> versus PBS-treated *Gcgr*<sup>+/+</sup> mice, GCGR mAb-treated *Gcgr*<sup>+/+</sup> versus PBS-treated *Gcgr*<sup>+/+</sup> mice, and common to both models.**

**Table S2, related to Figure 2. IPA analyses of hepatic gene expression in PBS-treated *Gcgr*<sup>-/-</sup> versus PBS-treated *Gcgr*<sup>+/+</sup> mice and GCGR mAb-treated *Gcgr*<sup>+/+</sup> versus PBS-treated *Gcgr*<sup>+/+</sup> mice.**

**Table S3, related to Figure 2. Aptamer screening of serum proteome in mice with interrupted glucagon signaling.**

**Table S4, related to Figure 4. Amino acid media concentrations used for islet culture model.**

**Table S5, related to Figure 4. Linear regression analyses of media amino acid concentration versus  $\alpha$ -cell proliferation rate in mouse islet cultures.**

**Table S6, related to Figure 5. Donor information for human islet experiments.**

Figure S1, Dean et al.

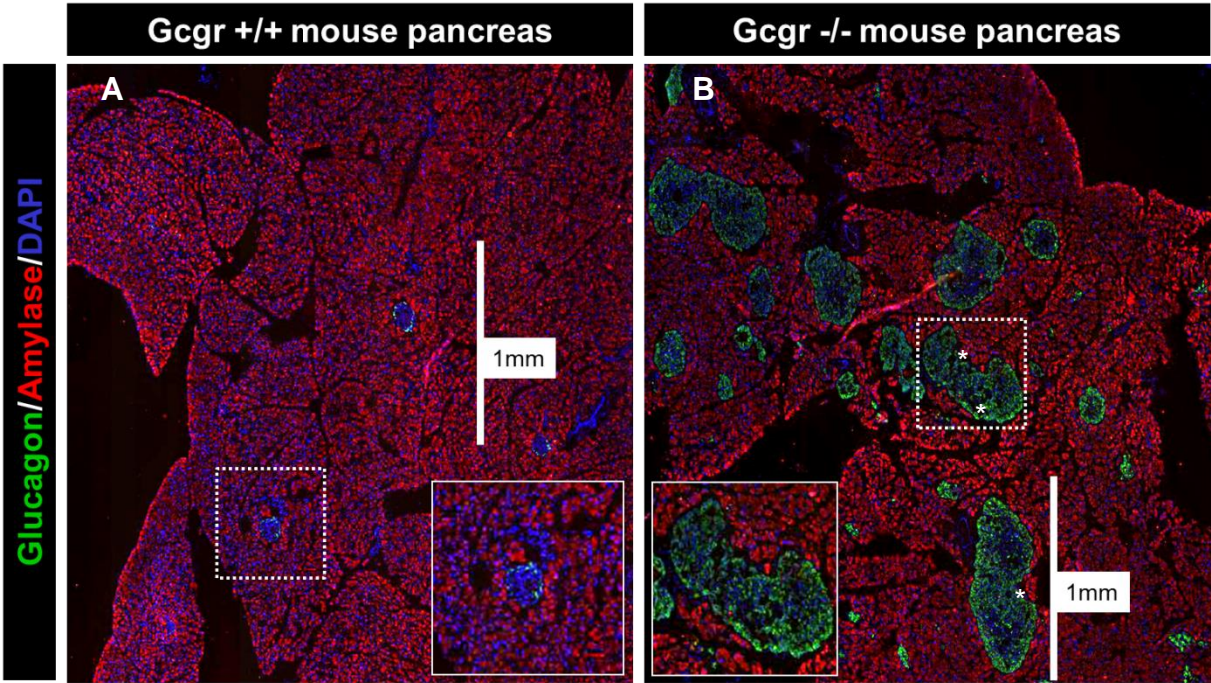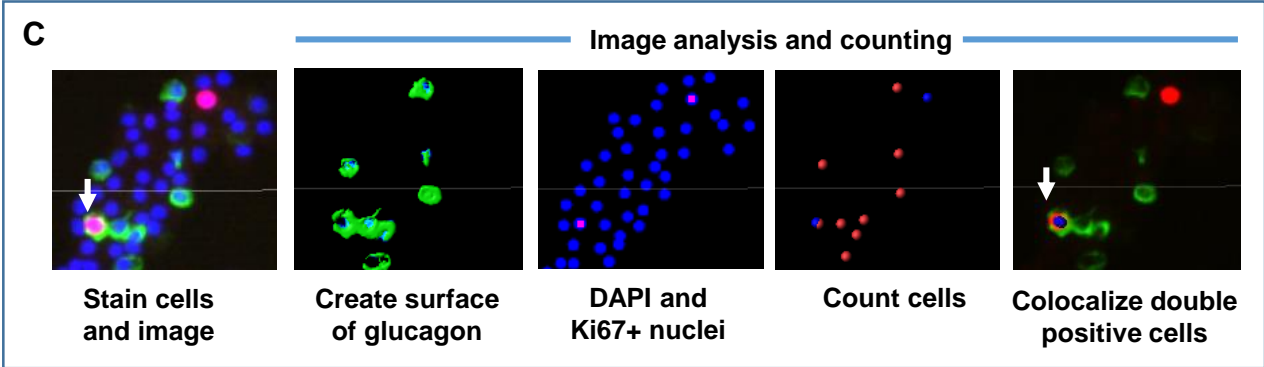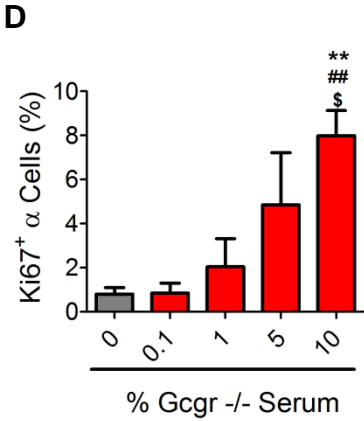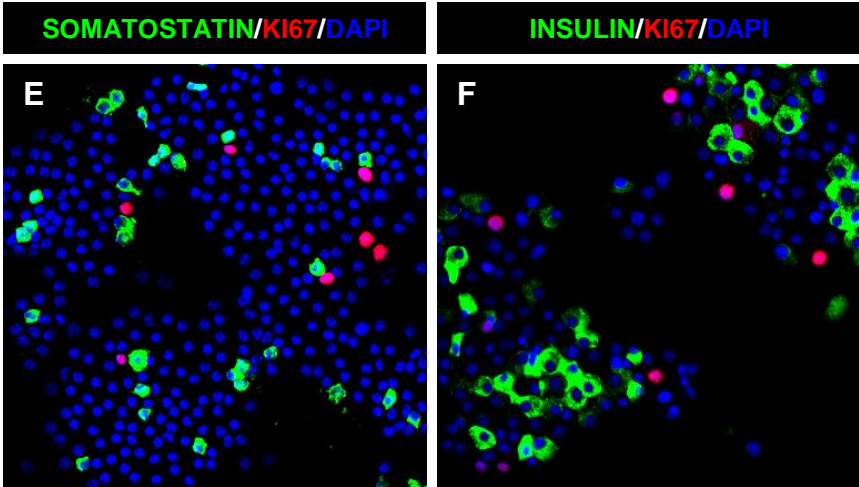



# Figure S2 continued, Dean et al.

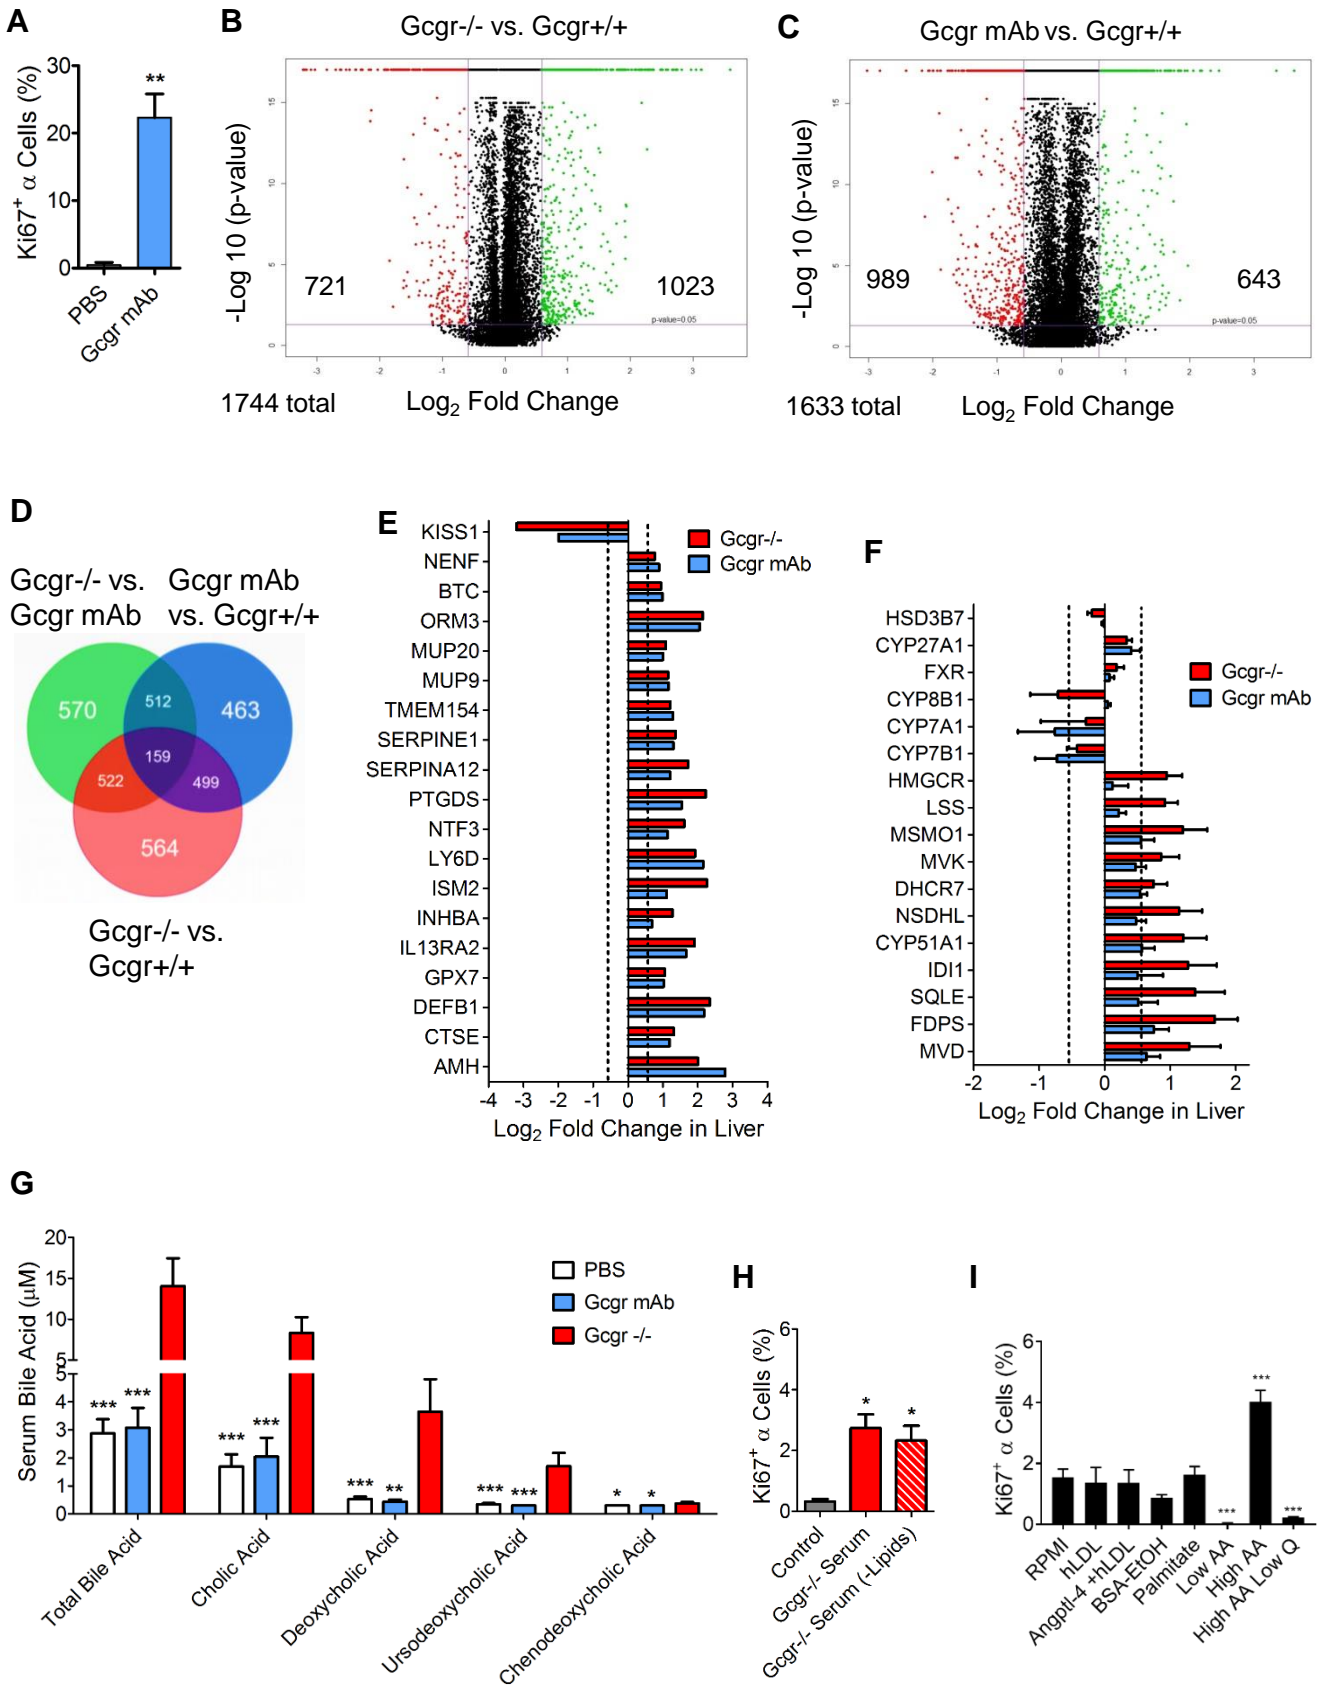

**Figure S3, Dean et al.**

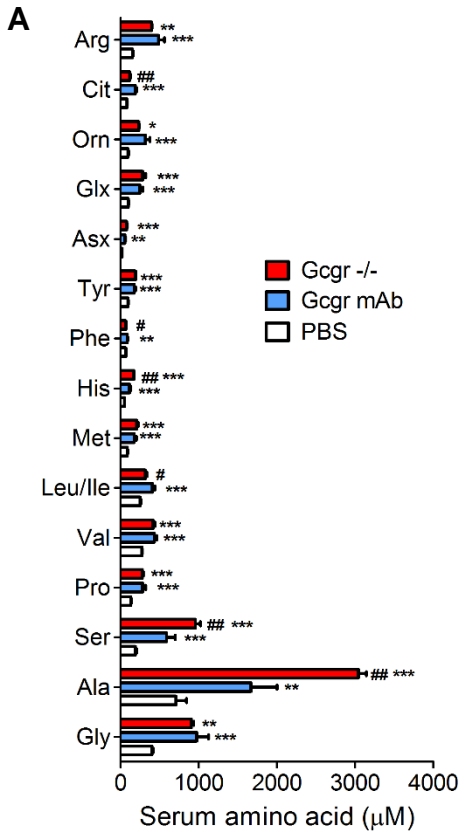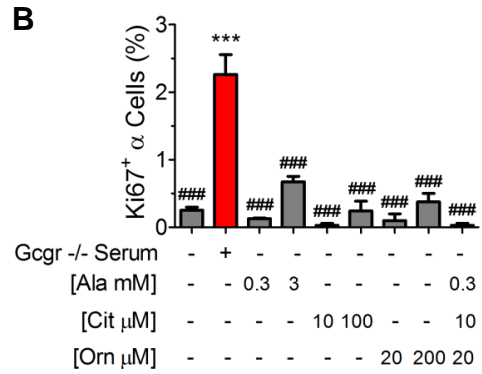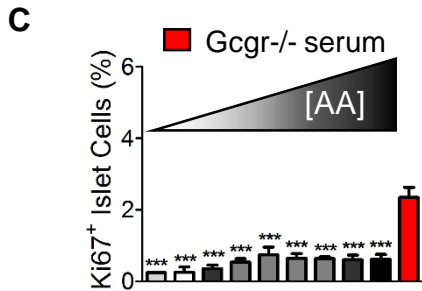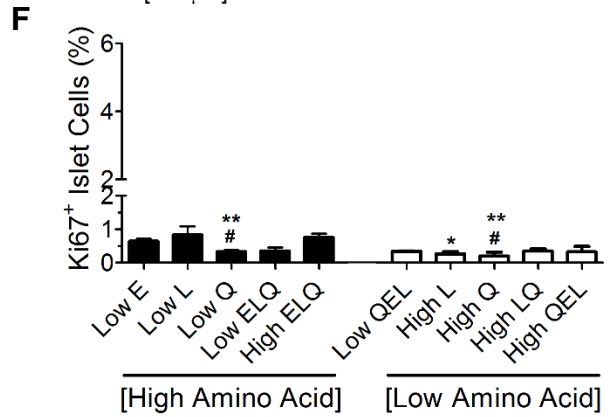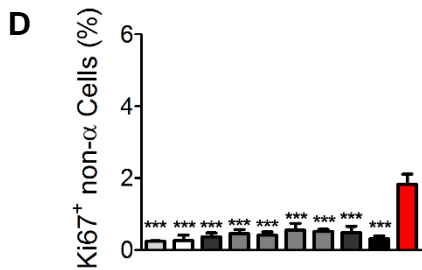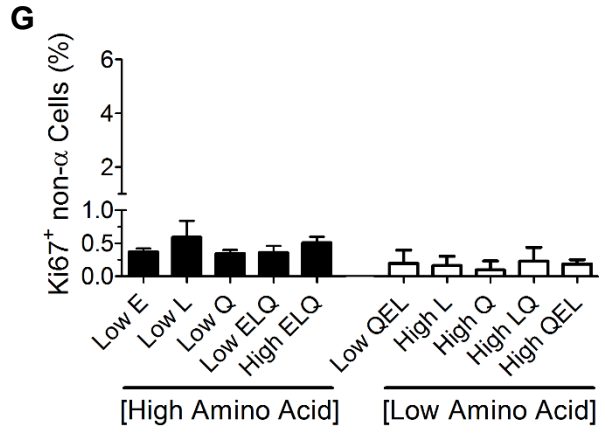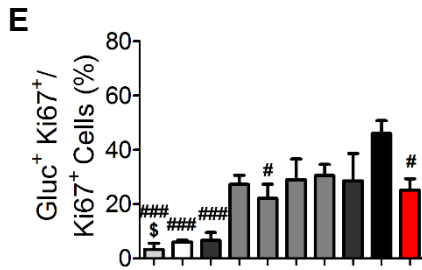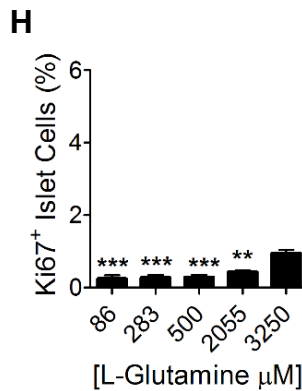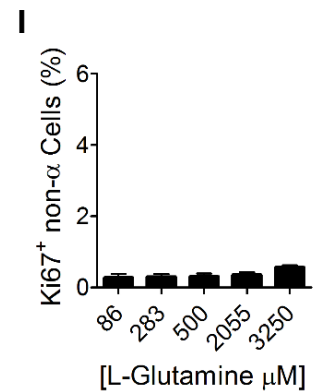

**Figure S4, Dean et al.**

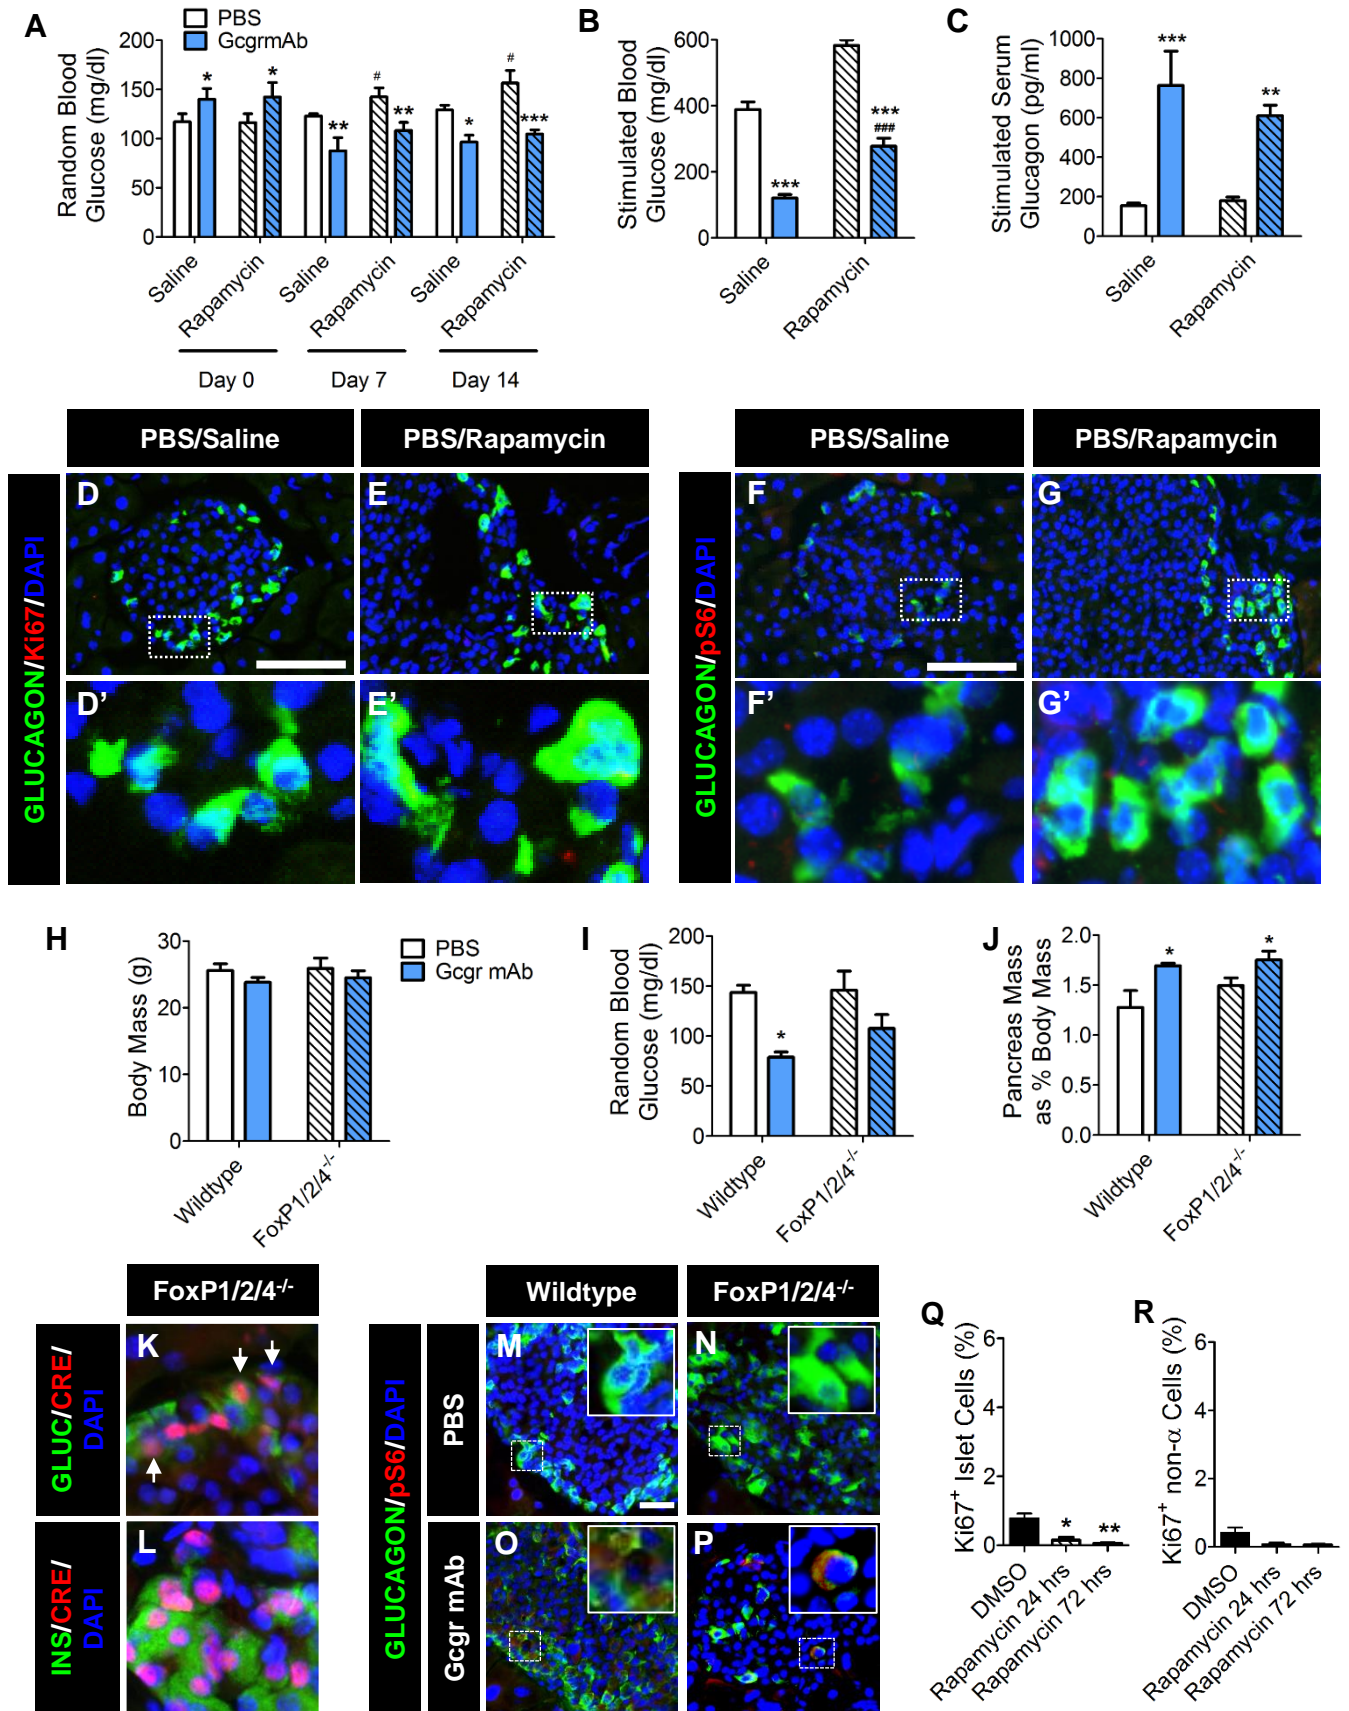

Figure S5, Dean et al.

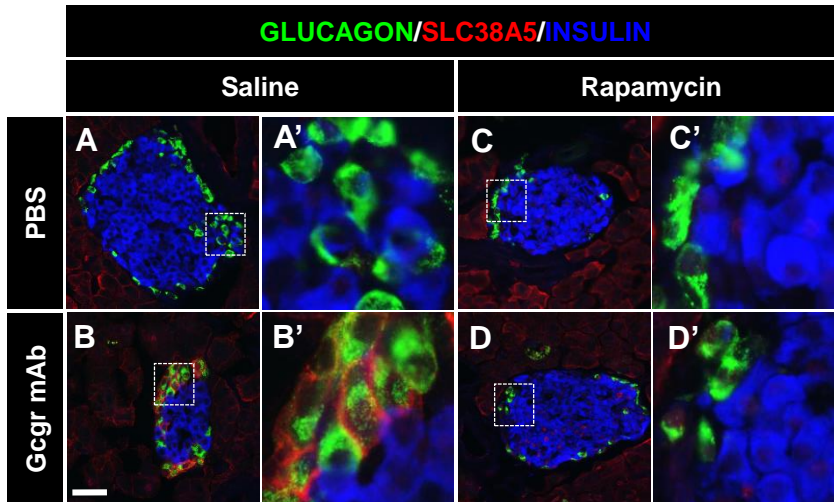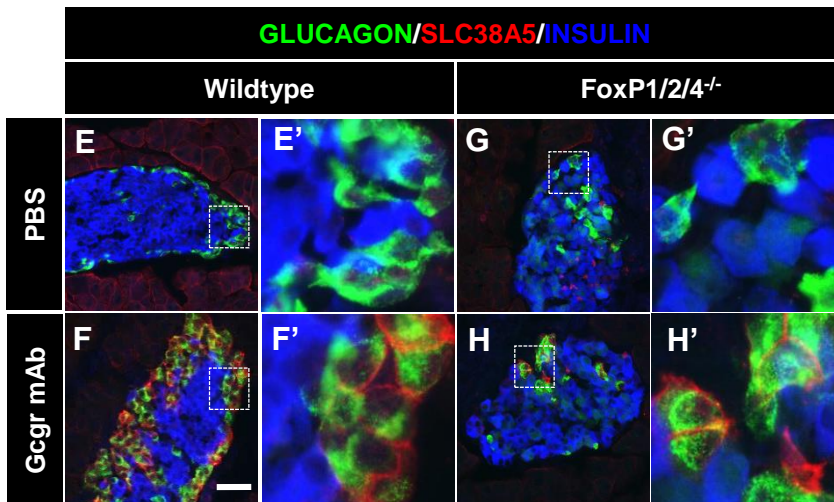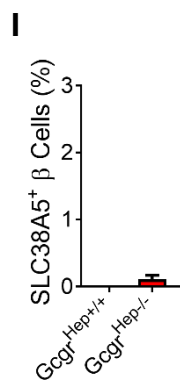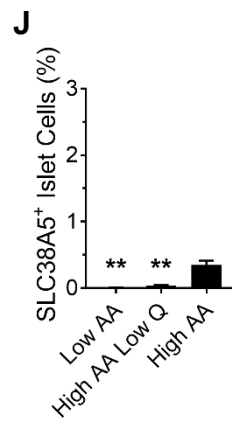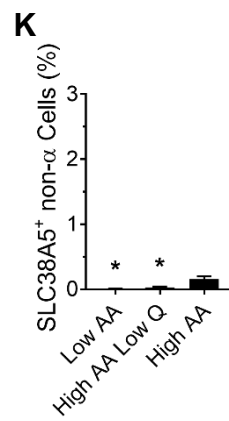



# Figure S6, Dean et al.

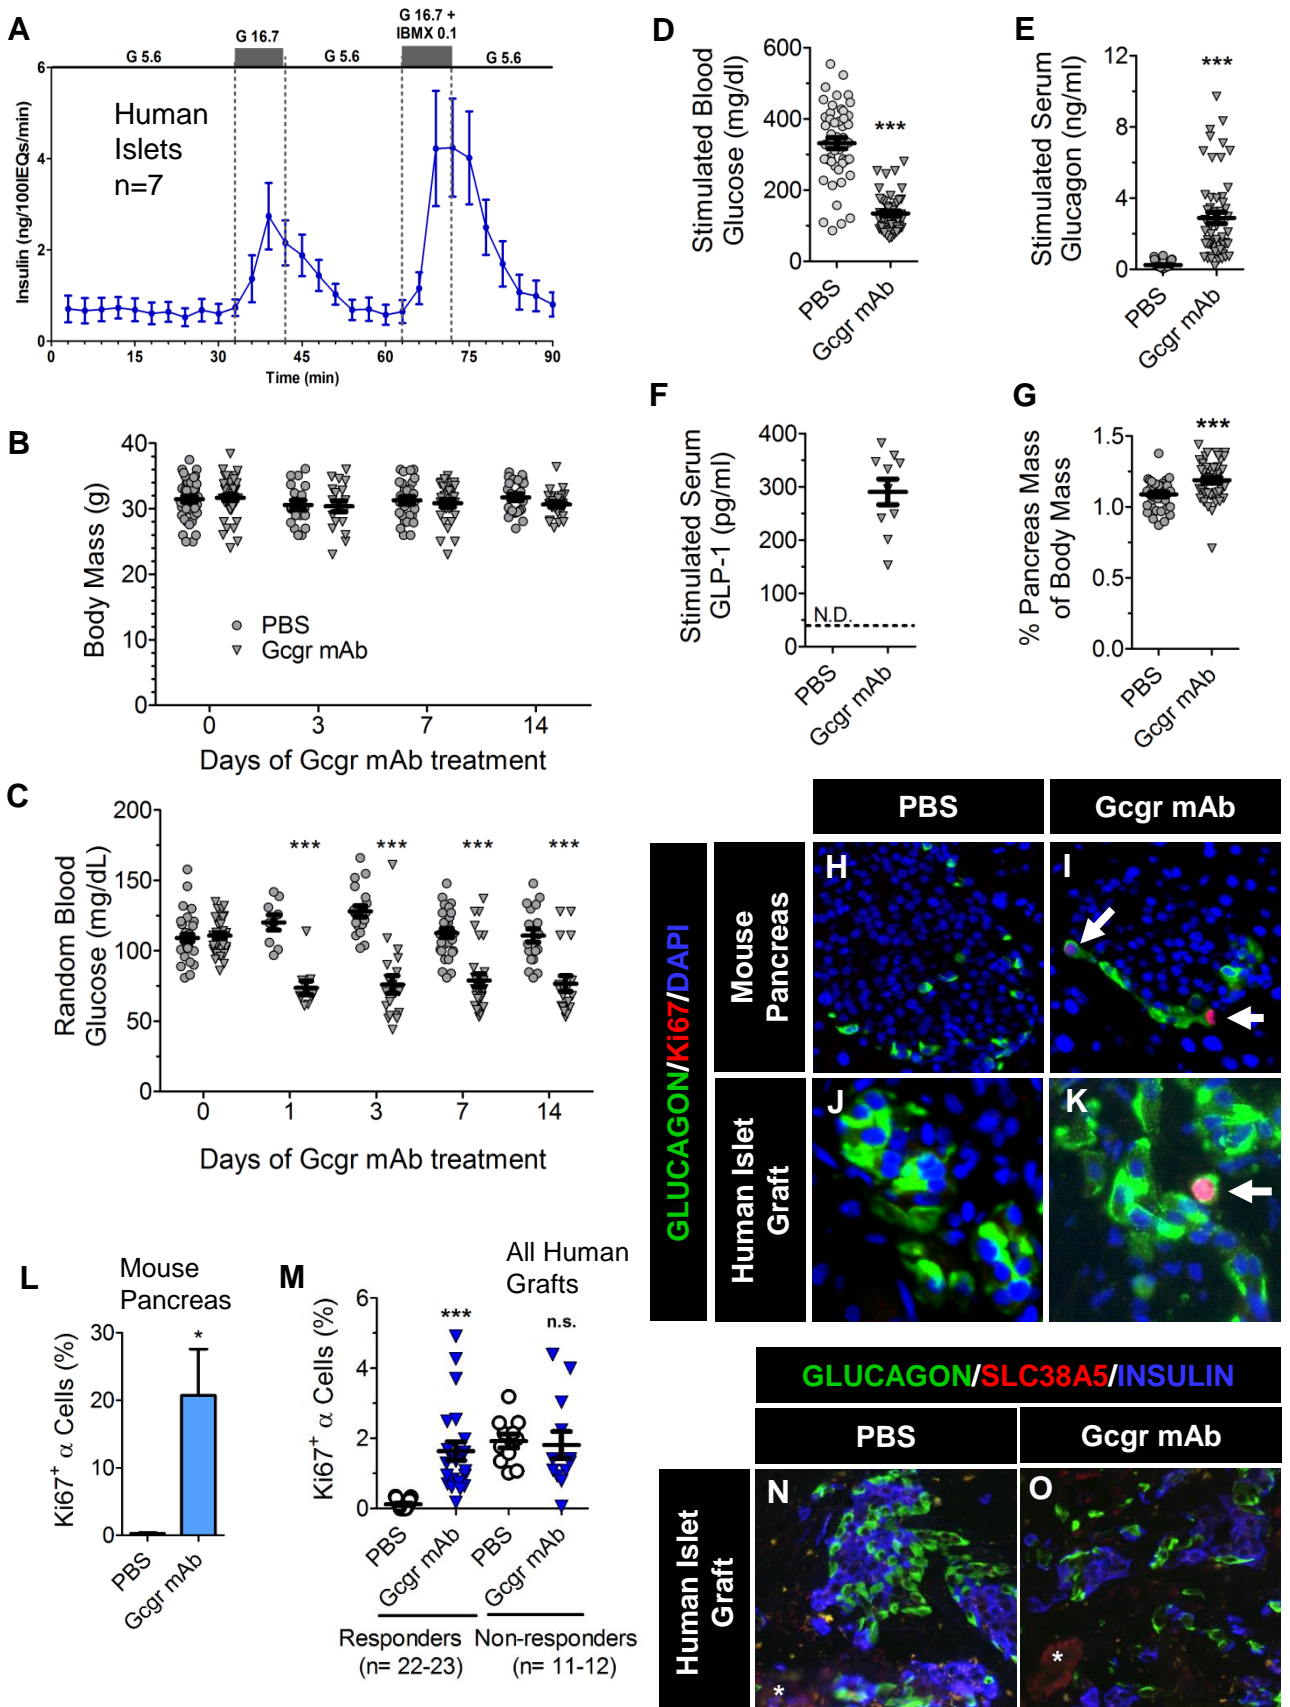

**Table S4, related to Figure 4. Amino acid media concentrations used for islet culture model.**

| <b>Media #</b>                    | <b>1</b> | <b>2</b> | <b>3</b> | <b>4</b> | <b>5</b> | <b>6</b> | <b>7</b> | <b>8</b> | <b>9</b> | <b>Gcgr+/+ serum</b> | <b>Gcgr/- serum</b> | <b>Est. media plus 10% Gcgr+/+ serum</b> | <b>Est. media plus 10% Gcgr/- serum</b> | <b>FC in Gcgr/- versus Gcgr+/+ serum</b> |
|-----------------------------------|----------|----------|----------|----------|----------|----------|----------|----------|----------|----------------------|---------------------|------------------------------------------|-----------------------------------------|------------------------------------------|
| Glycine                           | 451      | 200      | 905      | 165      | 210      | 141      | 133      | 270      | 1500     | 297                  | 1575                | 149                                      | 277                                     | 5.30                                     |
| L-Arginine                        | 158      | 40       | 397      | 1050     | 1074     | 1142     | 1149     | 1094     | 600      | 106                  | 519                 | 1045                                     | 1086                                    | 4.90                                     |
| L-Asparagine                      | 27       | 40       | 76       | 344      | 349      | 376      | 379      | 376      | 350      | 107                  | 787                 | 352                                      | 420                                     | 7.35                                     |
| L-Aspartic acid                   | 50       | 10       | 60       | 140      | 141      | 149      | 150      | 136      | 10       | 16                   | 50                  | 137                                      | 140                                     | 3.11                                     |
| L-Cystine 2HCl                    | 20       | 10       | 40       | 189      | 191      | 206      | 208      | 188      | 10       | ND                   | ND                  | 187                                      | 187                                     | ND                                       |
| L-Glutamic Acid                   | 50       | 100      | 100      | 127      | 132      | 136      | 136      | 152      | 300      | 55                   | 136                 | 128                                      | 136                                     | 2.47                                     |
| L-Glutamine                       | 86       | 500      | 283      | 1858     | 1878     | 2037     | 2055     | 2174     | 3250     | 495                  | 3102                | 1899                                     | 2160                                    | 6.26                                     |
| L-Histidine                       | 57       | 40       | 170      | 93       | 104      | 98       | 97       | 112      | 250      | 67                   | 285                 | 94                                       | 116                                     | 4.26                                     |
| L-Hydroxyproline                  | 40       | 0        | 108      | 40       | 108      | 152      | 153      | 137      | 0        | ND                   | ND                  | 138                                      | 138                                     | ND                                       |
| L-Isoleucine                      | 273      | 125      | 317      | 371      | 375      | 381      | 382      | 369      | 250      | 135                  | 218                 | 357                                      | 366                                     | 1.62                                     |
| L-Leucine                         | 273      | 225      | 317      | 371      | 375      | 381      | 382      | 384      | 400      | 167                  | 330                 | 361                                      | 377                                     | 1.97                                     |
| L-Lysine HCL                      | 350      | 200      | 1000     | 282      | 347      | 281      | 274      | 367      | 1200     | 253                  | 974                 | 272                                      | 344                                     | 3.86                                     |
| L-Methionine                      | 106      | 60       | 209      | 101      | 111      | 102      | 101      | 119      | 280      | 66                   | 213                 | 98                                       | 112                                     | 3.21                                     |
| L-Phenylalanine                   | 69       | 75       | 67       | 89       | 89       | 91       | 91       | 89       | 75       | 67                   | 75                  | 89                                       | 89                                      | 1.11                                     |
| L-Proline                         | 154      | 85       | 279      | 172      | 184      | 175      | 174      | 197      | 400      | 118                  | 313                 | 168                                      | 188                                     | 2.67                                     |
| L-Serine                          | 239      | 100      | 959      | 281      | 353      | 292      | 286      | 382      | 1250     | 133                  | 1296                | 271                                      | 387                                     | 9.75                                     |
| L-Threonine                       | 200      | 150      | 900      | 171      | 241      | 175      | 168      | 326      | 1750     | 166                  | 1521                | 168                                      | 303                                     | 9.18                                     |
| L-Tryptophan                      | 40       | 65       | 45       | 26       | 27       | 25       | 25       | 29       | 65       | 78                   | 99                  | 30                                       | 32                                      | 1.26                                     |
| L-Tyrosine                        | 104      | 50       | 196      | 110      | 120      | 112      | 111      | 125      | 250      | 83                   | 187                 | 108                                      | 119                                     | 2.25                                     |
| L-Valine                          | 265      | 300      | 414      | 180      | 195      | 173      | 171      | 214      | 600      | 250                  | 492                 | 179                                      | 203                                     | 1.97                                     |
| Alanine                           | 1125     | 350      | 3040     | 113      | 304      | 30       | 0        | 225      | 2250     | 513                  | 2736                | 51                                       | 274                                     | 5.34                                     |
| Ornithine                         | 86       | 100      | 234      | 9        | 23       | 2        | 0        | 40       | 400      | 86                   | 418                 | 9                                        | 42                                      | 4.84                                     |
| Citrulline                        | 65       | 0        | 118      | 7        | 12       | 1        | 0        | 0        | 0        | 70                   | 144                 | 7                                        | 14                                      | 2.06                                     |
| Taurine                           | 0        | 0        | 0        | 0        | 0        | 0        | 0        | 0        | 0        | 466                  | 623                 | 47                                       | 62                                      | 1.34                                     |
| Total [AA] concentration in media | 4288     | 2825     | 10234    | 6289     | 6943     | 6658     | 6625     | 7505     | 15440    | 3328                 | 15469               | 6295                                     | 7509                                    | 4.65                                     |

Table S6, related to Figure 5. Donor information for human islet experiments.

| Donor | Age | Gender (M/F) | BMI (kg/m <sup>2</sup> ) |
|-------|-----|--------------|--------------------------|
| 1     | 32  | M            | 29.5                     |
| 2     | 47  | M            | 22.3                     |
| 3     | 55  | M            | 28.4                     |
| 4     | 43  | M            | 29.6                     |
| 5     | 46  | M            | 28.8                     |
| 6     | 41  | F            | 31.1                     |
| 7     | 47  | F            | 25.6                     |
| 8     | 52  | M            | 33.2                     |
